# Supplementary material
Source: PubMed Central journal article supplement (PMC5629315)
Supplement: 447FigureS1.pdf [file 447FigureS1.pdf]

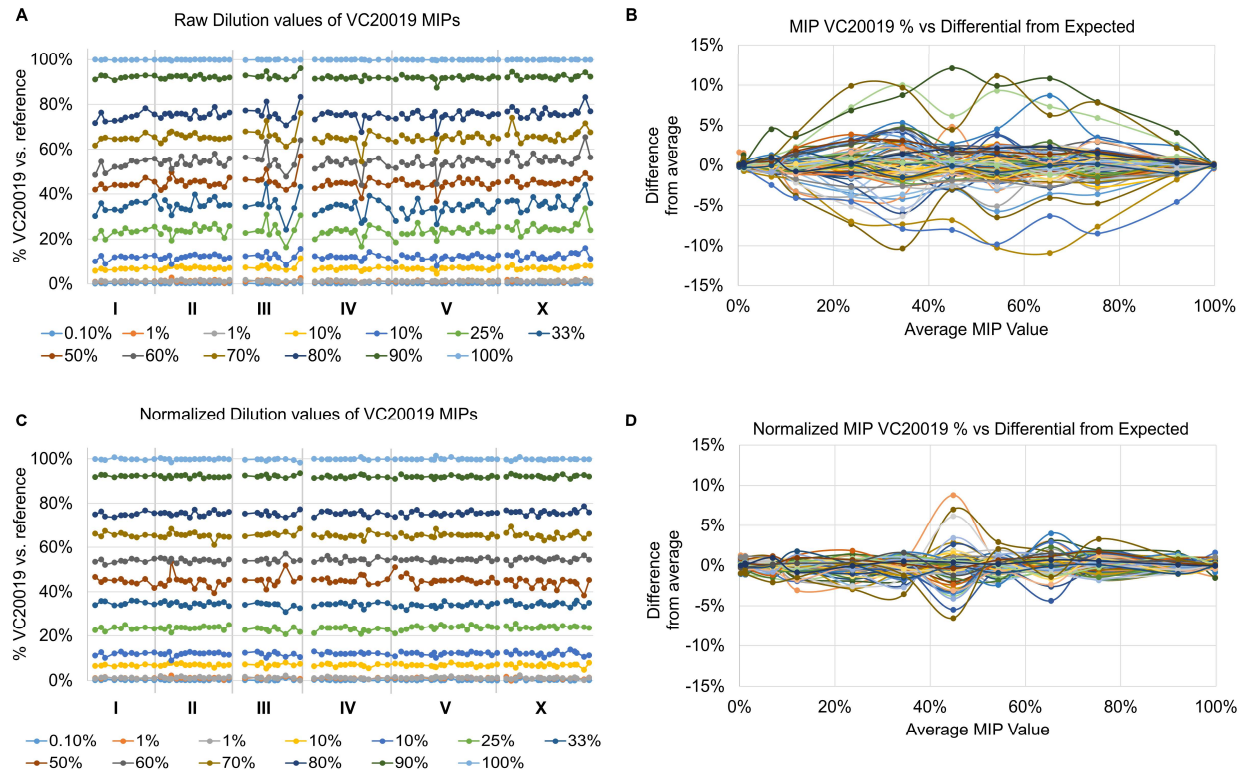

**Figure S1. MIPs generate consistent results but may require normalization.** The concordance of SNV ratios across MIPs multiple loci and sample dilutions (A), identified a small subset of MIPs that generated incorrect read calls across multiple dilutions. The difference between the called dilution value and the average across all 89 MIPs was used to generate a behavioural curve (B). Behavioural curves were used to normalize the MIP SNV ratios, generating more consistent calls across all MIP targets (C, D).
