# Supplementary material
Source: PubMed Central journal article supplement (PMC5629315)
Supplement: 447FigureS3.pdf [file 447FigureS3.pdf]

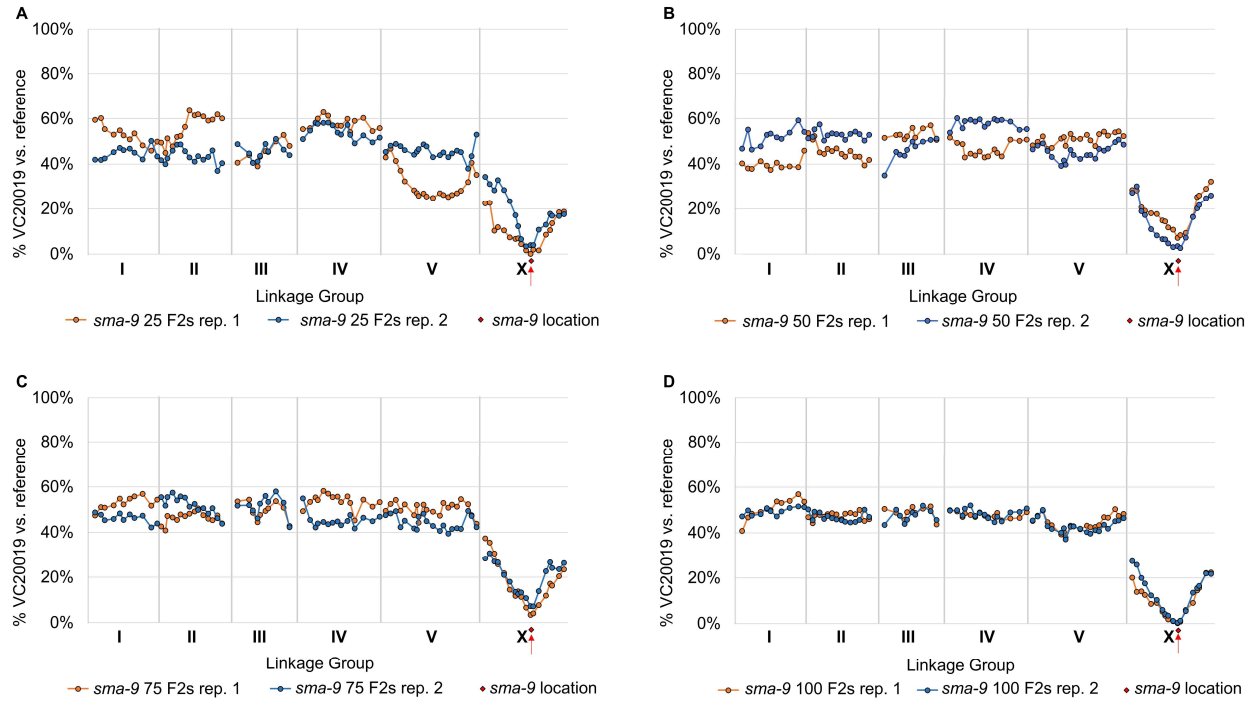

**Figure S3. MIP-MAP profiles for *sma-9* mutants improves when using more F2 recombinants.** A sufficient MIP-MAP profile to identify the *sma-9* locus was generated with as few as 25 F2 *sma-9* phenotype animals (A) but mapping improved with increasing numbers of F2s populations at 50 (B), 75 (C) and 100 (D) F2 animals.
