# Supplementary material
Source: PubMed Central journal article supplement (PMC5629315)
Supplement: 447FigureS5.pdf [file 447FigureS5.pdf]

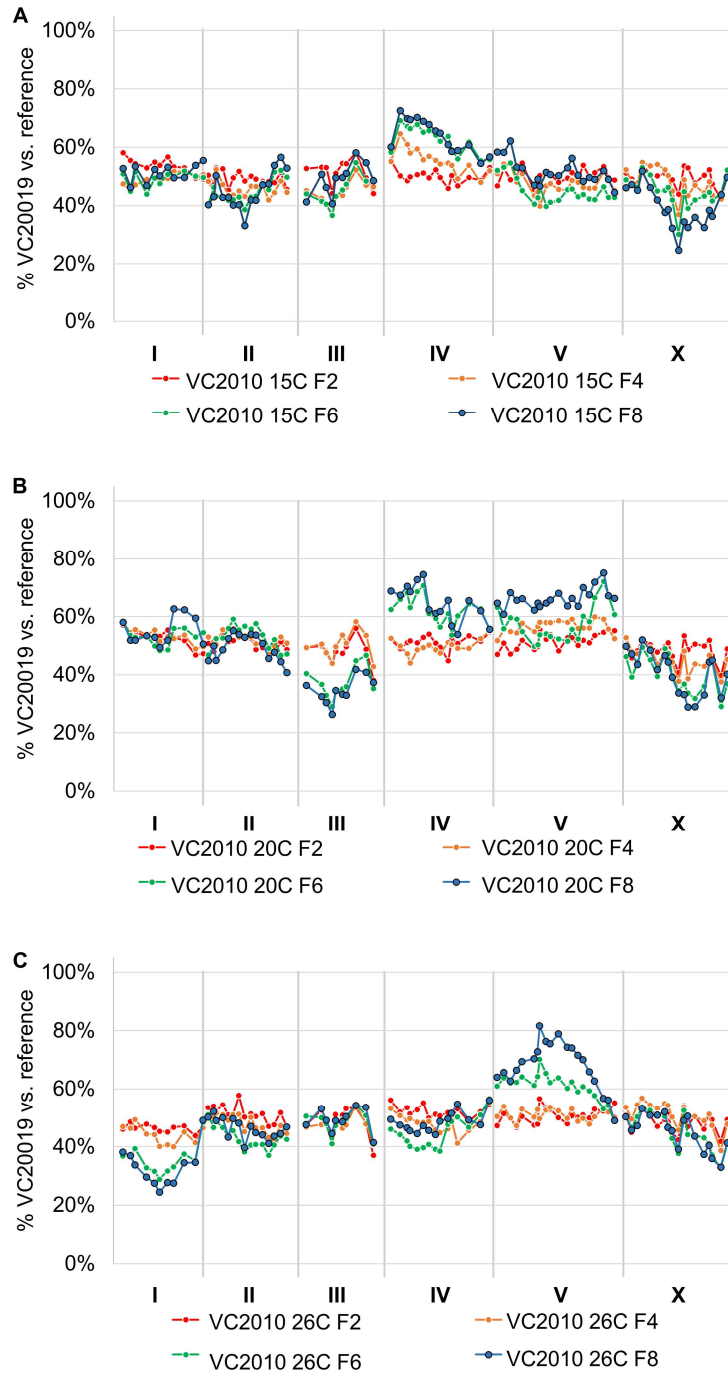

**Figure S5. VC20019 appears to have little to no temperature-sensitivity.** The mapping profile of a cross between VC20019 and VC2010 was completed with very little fixation at any particular locus across the genome after mapping at 15° (A), 20° (B), and 25° (C) for at least 8 generations. This data indicates that the genome of mapping mutant VC20019 has comparable fitness to our N2 reference *C. elegans* strain VC2010.
