# Supplementary material
Source: PubMed Central journal article supplement (PMC5629315)
Supplement: 447FigureS6.pdf [file 447FigureS6.pdf]

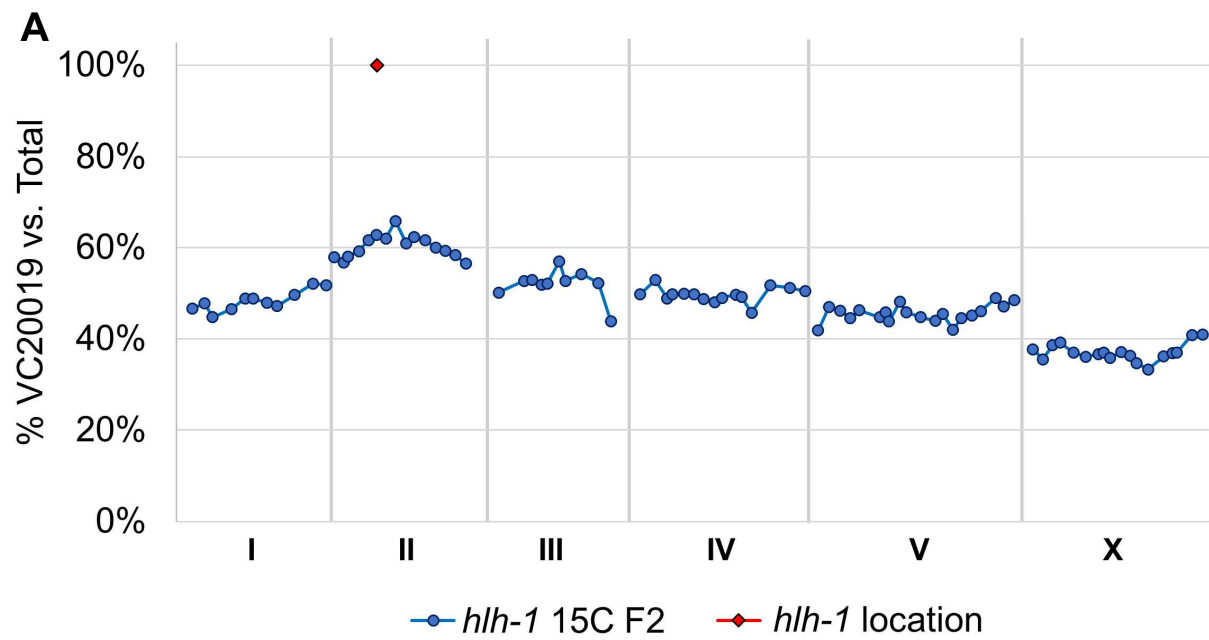

**Figure S6. The *hjh-1(cc561)* allele exhibits mild fitness defects at a permissive temperature.** While mapping the *hjh-1(cc561)* allele at 15° the beginnings of fixation against the *hjh-1* interval was observed, even after a single generation at the permissive temperature.
