# Supplementary material
Source: PubMed Central journal article supplement (PMC5629315)
Supplement: 447FigureS7.pdf [file 447FigureS7.pdf]

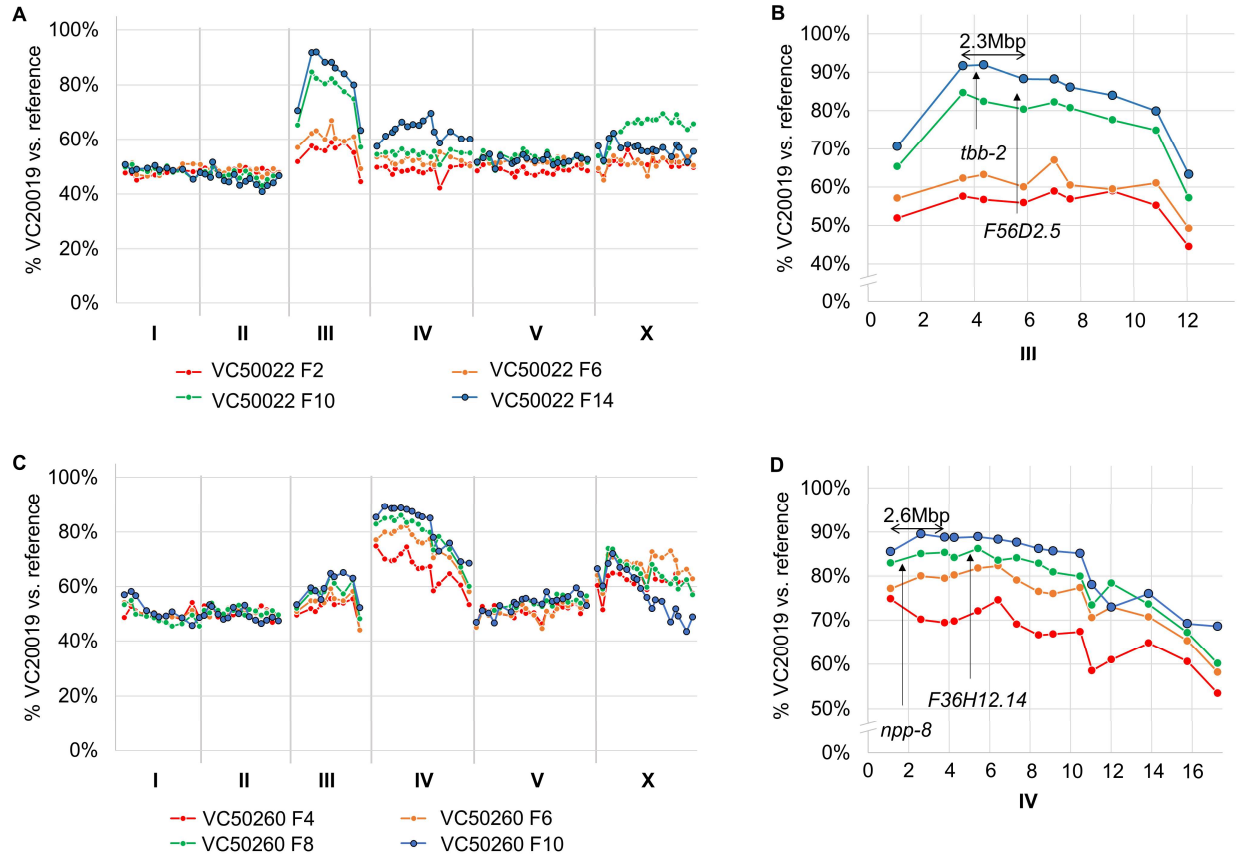

**Figure S7. TS strains that resolved with a single locus.** VC50022 is an example of a clean TS mapping that identified a single locus without additional loci (A). In this strain, there are only 2 relevant coding mutations within the identified interval on LGIII (B). The most likely candidate *tbb-2* has a number of embryonic lethal phenotypes. VC50260 (C) resolved without much indication of any other candidate loci. Within this interval on LGIV there was only 1 relevant coding variant which was located in *npp-8* (D). The next closest relevant coding variant is in *F36H12.14* nearly 1.5 Mbp from the predicted interval.
