# Supplementary material
Source: PubMed Central journal article supplement (PMC5629315)
Supplement: 447FigureS9.pdf [file 447FigureS9.pdf]

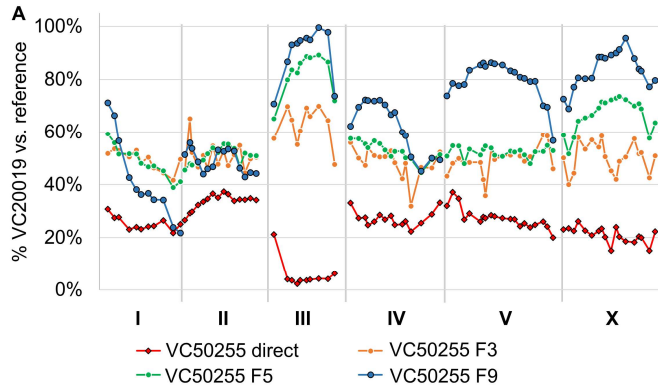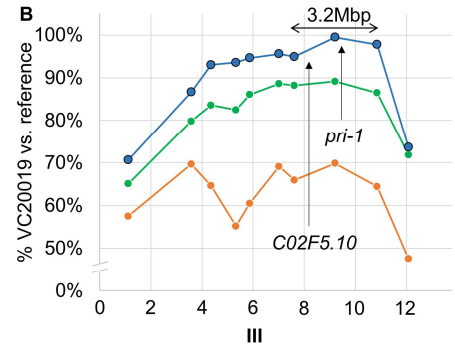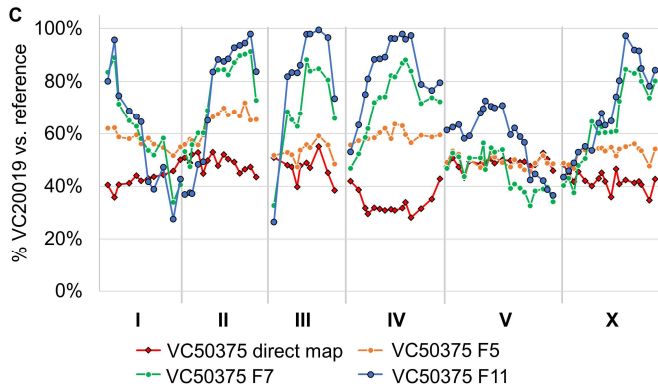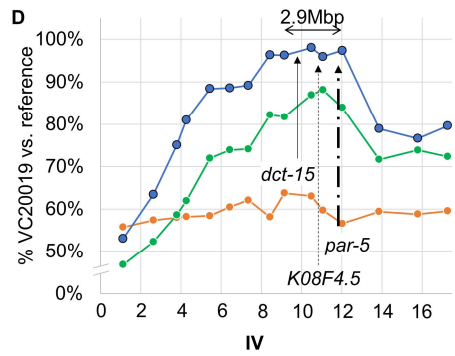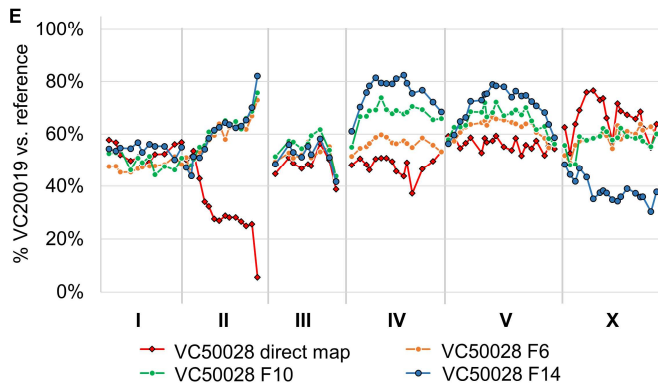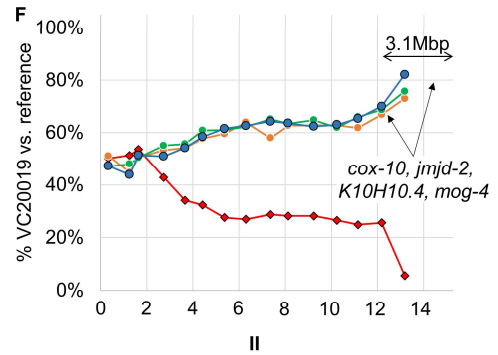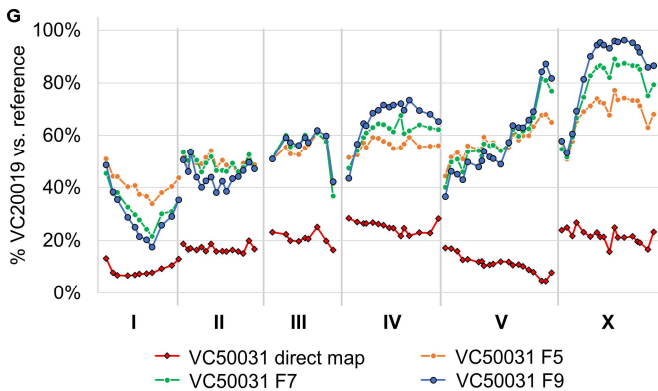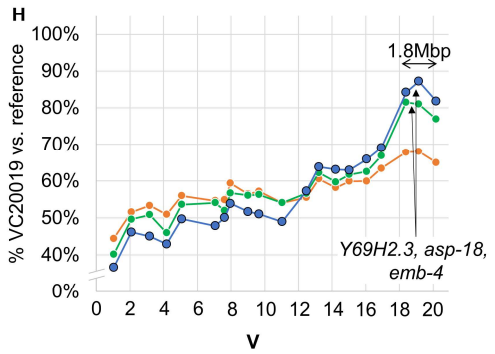

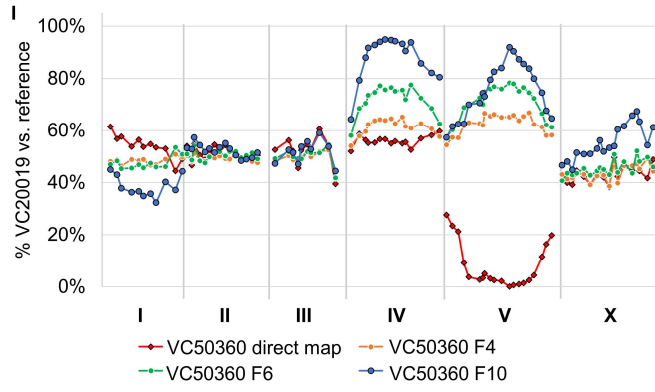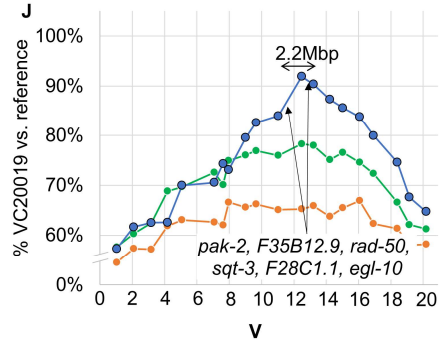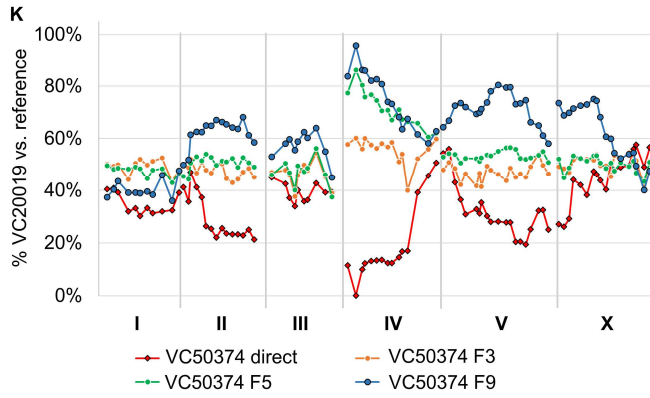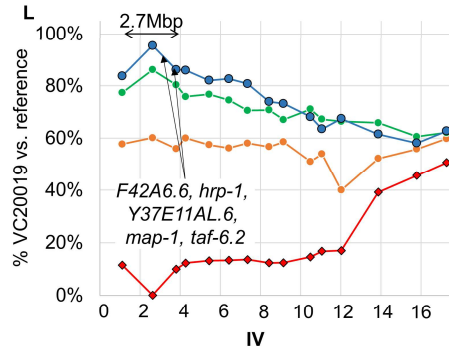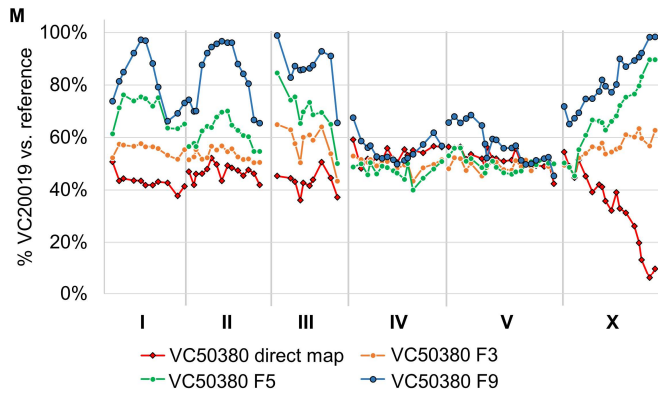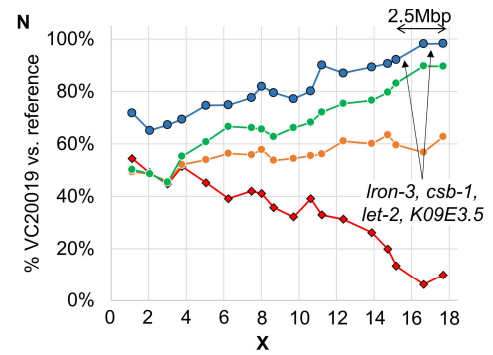

**Figure S9. TS strains can carry multiple strong fitness-defective loci.** In three cases, the competitive fitness mapping protocol identified multiple loci within these strains that conferred an overall reduced fitness to the population at a fixation rate that made it difficult to identify the correct TS-specific locus. Additional mapping with the liquid-format bulk segregant assay elucidated the correct linkage group for the TS phenotype - albeit with lower resolution. The TS-associated locus in VC50255 was identified at LGIII (A) with the prime candidate as *pri-1* based on phenotype and Wormbase reports (B). A 2.9 Mbp TS interval was identified in VC50375 on LGIV (C) containing 3 candidates (D) with the prime candidate as *par-5* based on a shared cell-cycle delay phenotype in the strain. In VC50028 a 3.1 Mbp interval on LGII was identified (E). The primary candidate based on shared phenotype data between the strain and Wormbase sources is *mog-4* (F). The strain VC50031 had multiple loci with a TS-associated hit on a 1.8 Mbp interval on LGV and a likely hit for *lin-2* on LGX (G). The primary candidate in this interval is *emb-4* (H) based on VC50031's sterility phenotype and a reported high early embryonic expression of this gene. The strain VC50360 produced a mapping profile (I) with two very strong candidate loci and resolved to a 2.2M bp interval on LGV (J) with a primary candidate of *sqt-3* as the strain's phenotype overlapped with reported RNAi and allele phenotypes. VC50374 exhibited a number of peaks that were mirrored in liquid-format segregant mapping with the TS-locus resolved at LGIV (K). The 2.7 Mbp interval (L) contained many candidates with the primary candidate as *taf-6.2*, a gene reported to have embryonic lethal phenotypes and TS lethal alleles. One such allele is located in the same exon as the VC50374 SNV. The TS strain VC50380 (M) identified 4 strong low-fitness loci with liquid-format bulk segregant mapping resolving the TS locus to LGX. Within this interval (N) the primary candidate is *let-2* based on reported phenotypes compared to this strain. Single arrows indicate positions of genes while double-arrows identify the interval spanned by a list of genes.
