# Supplementary material
Source: PubMed Central journal article supplement (PMC5629315)
Supplement: 447TableS1.pdf [file 447TableS1.pdf]

Table S1. 96-well liquid mapping number of F2 segregants used

| Strain  | Set | Direct Mapping number<br>of F2s (chosen/total) | % F2s Picked | Mapping observations                                                                                                                               |
|---------|-----|------------------------------------------------|--------------|----------------------------------------------------------------------------------------------------------------------------------------------------|
| VC50352 | 2   | 37/362                                         | 10.22        | Clear peak by F10 but carried to F14. Direct mapping locus only fixates to 20%.                                                                    |
| VC50255 | 1   | 66/440                                         | 15.00        | Clearest interval by F9. Direct mapping has very broad interval across most of LGIII.                                                              |
| VC50375 | 1   | 109/453                                        | 24.06        | Clear peak at F7 but also matched in amplitude by 4 other peaks. Direct map resolved chromosome but with poor resolution.                          |
| VC50028 | 3   | No Data                                        | No Data      | Quick fixation observed on LGII to 80% by F6 but does not improve even at F15. Direct mapping mirrored exact interval.                             |
| VC50031 | 3   | 72/737                                         | 9.76         | Clear interval on LGV by F7 but best at F9. Direct mapping has high signal noise but confirms LGV.                                                 |
| VC50141 | 3   | 75/387                                         | 19.37        | Mapping doesn't clarify until between F8 and F12. Direct mapping fixates to ~30% on each locus.                                                    |
| VC50360 | 2   | 98/439                                         | 22.32        | Clearest interval on LGV by F10. Direct mapping confirms but with a very broad interval across most of LGV.                                        |
| VC50374 | 2   | 15/384                                         | 3.90         | Clear interval on LGIV by F5 but best fixation by F9. Direct mapping managed to identify the interval with 15 F2s.                                 |
| VC50380 | 2   | 42/384                                         | 10.93        | Somewhat clear peak on LGX by F5 but reached fixation at F9 with 3 additional strong intervals. Direct mapping confirmed LGX with good resolution. |
